# Supplementary material for: A fluorogenic probe based on chelation–hydrolysis-enhancement mechanism for visualizing Zn2+ in Parkinson's disease models
Source: Royal Society of Chemistry journal article supplement (doi:10.1039/c8tb03343a), 2019-01-01
Supplement: c8tb03343a1.pdf [file c8tb03343a1.pdf]

## *Supporting Information*

### **Fluorogenic probe based on chelation-hydrolysis-enhancement mechanism for visualizing Zn<sup>2+</sup> in Parkinson's disease models**

Gaobin Zhang,<sup>a†</sup> Yanfei Zhao,<sup>a†</sup> Bo Peng,<sup>b</sup> Zheng Li,<sup>a</sup> Chenchen Xu,<sup>a</sup> Yi Liu,<sup>a</sup> Chengwu Zhang,<sup>a</sup>  
Nicolas H. Voelcker,<sup>b</sup> Lin Li,<sup>a\*</sup> and Wei Huang,<sup>a,c</sup>

<sup>a</sup>Key Laboratory of Flexible Electronics (KLOFE) & Institute of Advanced Materials (IAM),  
Jiangsu National Synergetic Innovation Center for Advanced Materials (SICAM), Nanjing Tech  
University (NanjingTech), 30 South Puzhu Road, Nanjing, 211816, P. R. China. E-mail:  
iamlli@njtech.edu.cn

<sup>b</sup>Monash Institute of Pharmaceutical Sciences, Monash University, 381 Royal Parade, Parkville,  
VIC, 3052, Australia

<sup>c</sup>Shaanxi Institute of Flexible Electronics (SIFE), Northwestern Polytechnical University (NPU),  
127 West Youyi Road, Xi'an 710072, P. R. China.

†These authors contributed equally to this work.

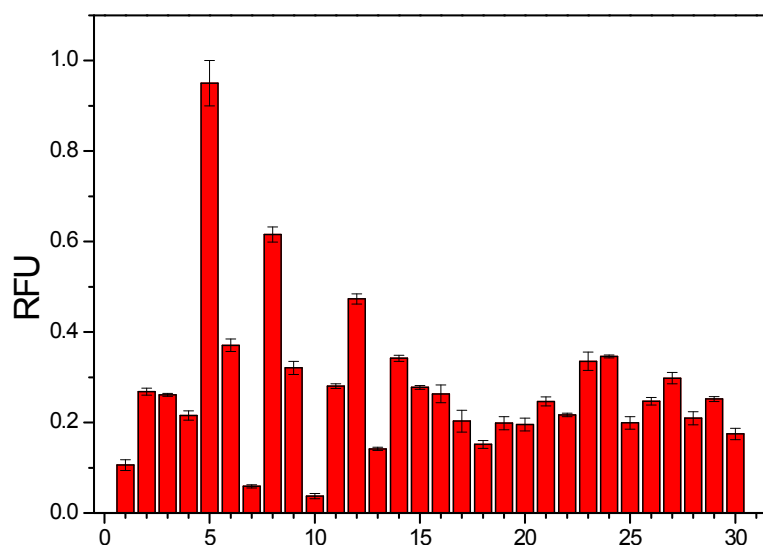

**Fig. S1.** Fluorescence response of compound **2** to various ions. Na<sup>+</sup>, Co<sup>2+</sup>, Ba<sup>2+</sup>, Ca<sup>2+</sup>, Al<sup>3+</sup>, K<sup>+</sup>, Cr<sup>3+</sup>, Zn<sup>2+</sup>, Ni<sup>2+</sup>, Fe<sup>3+</sup>, Mn<sup>2+</sup>, Cd<sup>2+</sup>, Cu<sup>2+</sup>, Mg<sup>2+</sup>, Pd<sup>2+</sup>, Ag<sup>+</sup>, Fe<sup>2+</sup>, F<sup>-</sup>, Cl<sup>-</sup>, Br<sup>-</sup>, I<sup>-</sup>, SCN<sup>-</sup>, HS<sup>-</sup>, HPO<sub>4</sub><sup>2-</sup>, H<sub>2</sub>PO<sub>4</sub><sup>-</sup>, SO<sub>3</sub><sup>2-</sup>, CO<sub>3</sub><sup>2-</sup>, Ac<sup>-</sup>, S<sup>2-</sup>, blank

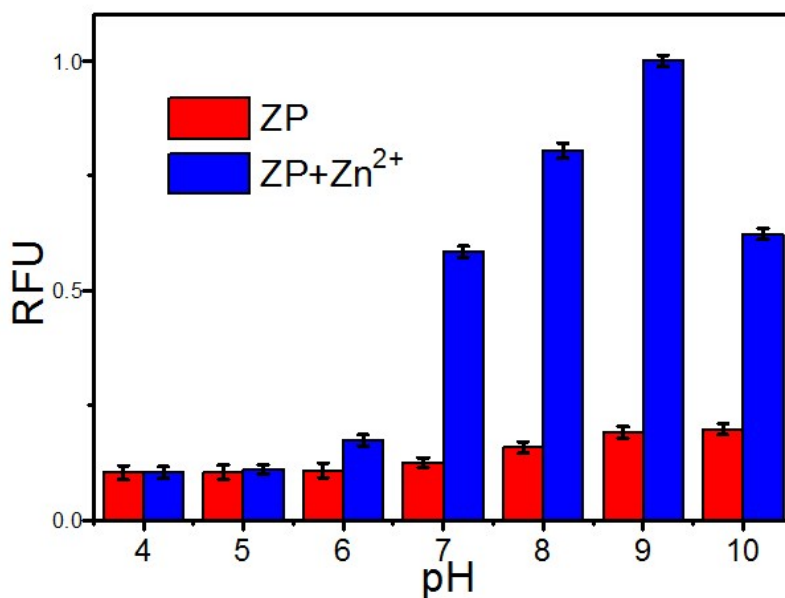

**Fig. S2.** Fluorescence colour bars of **ZP** and **ZP+Zn<sup>2+</sup>** at various pH values in Hepes buffer with 0.01% Triton X-100 ( $\lambda_{\text{ex}} = 400 \text{ nm}$ ).

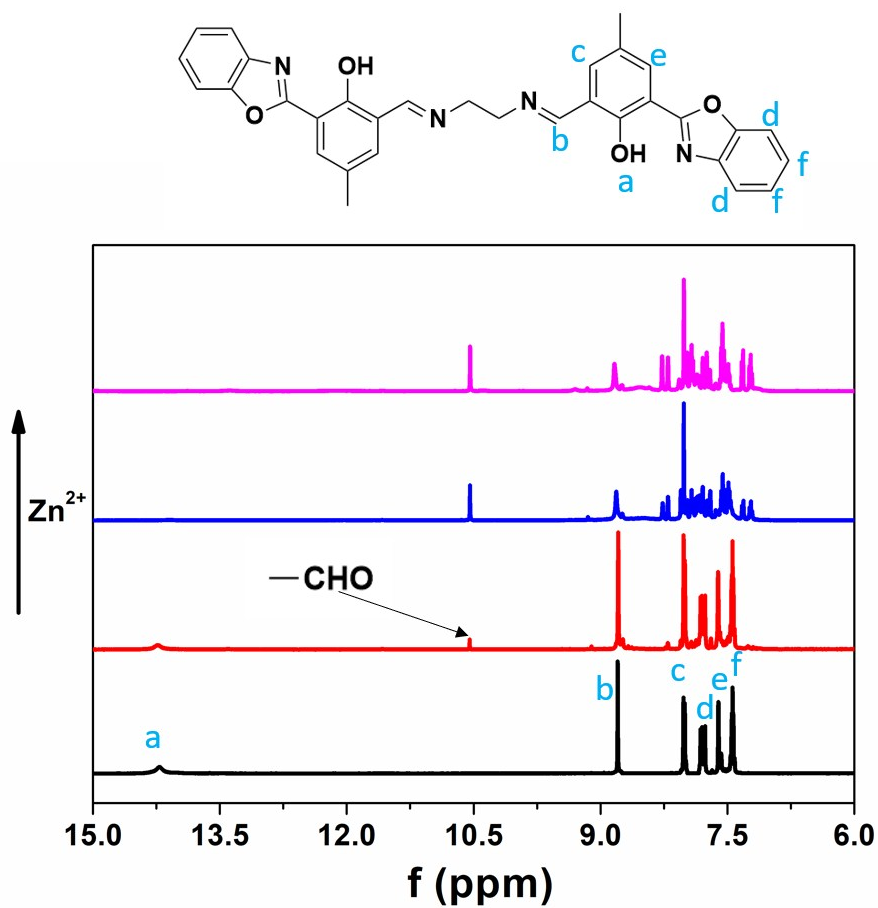

Fig. S3. <sup>1</sup>H NMR spectra of ZP in DMF-d<sub>7</sub> with the absence and presence of Zn<sup>2+</sup> ions

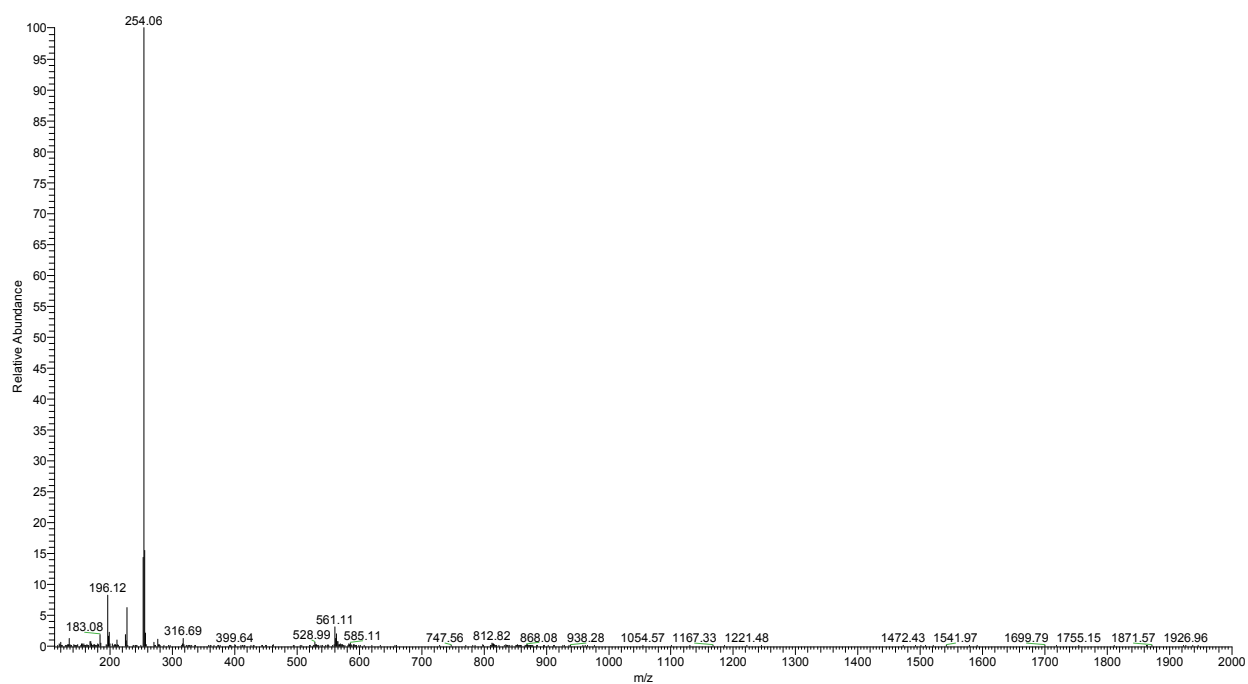

Fig. S4. The MS spectra of ZP+Zn<sup>2+</sup>

## Crystallography

CCDC 1845490 (**ZP-Zn<sup>2+</sup>**) contains the supplementary crystallographic data for this paper. The data can be obtained free of charge from The Cambridge Crystallographic Data Centre via [www.ccdc.cam.ac.uk/structures](http://www.ccdc.cam.ac.uk/structures).

**Table S1.** The detailed crystal and structure refinement data of the compounds

| Compounds                             | <b>ZP-Zn<sup>2+</sup></b>                                                      |
|---------------------------------------|--------------------------------------------------------------------------------|
| empirical formula                     | C <sub>30</sub> H <sub>20</sub> N <sub>4</sub> O <sub>12</sub> Zn <sub>2</sub> |
| formula weight                        | 759.24                                                                         |
| crystal system                        | Monoclinic                                                                     |
| space group                           | C 2/c                                                                          |
| <i>a</i> [Å]                          | 24.696(2)                                                                      |
| <i>b</i> [Å]                          | 8.3538(6)                                                                      |
| <i>c</i> [Å]                          | 16.7962(14)                                                                    |
| $\alpha$ [°]                          | 90                                                                             |
| $\beta$ [°]                           | 125.219(2)                                                                     |
| $\gamma$ [°]                          | 90                                                                             |
| <i>V</i> [Å <sup>3</sup> ]            | 2830.9(4)                                                                      |
| <i>Z</i>                              | 4                                                                              |
| <i>T</i> [K]                          | 296(2)                                                                         |
| <i>D</i> called [g·cm <sup>-3</sup> ] | 1.781                                                                          |
| <i>M</i> [mm <sup>-1</sup> ]          | 1.773                                                                          |
| $\theta$ rang [°]                     | 2.639-24.992                                                                   |
| total no. data                        | 2483                                                                           |
| no. unique data                       | 2138                                                                           |
| no. params refined                    | 218                                                                            |
| <i>R</i> <sub>1</sub>                 | 0.0312                                                                         |
| <i>wR</i> <sub>2</sub>                | 0.0747                                                                         |
| GOF                                   | 1.017                                                                          |

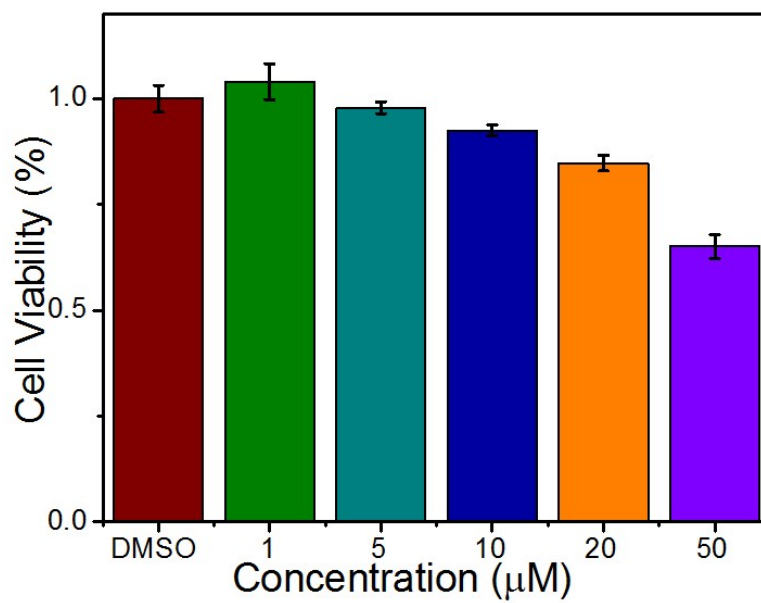

Fig. S5. Cytotoxicity data of ZP (Hela cells incubated for 12 h).

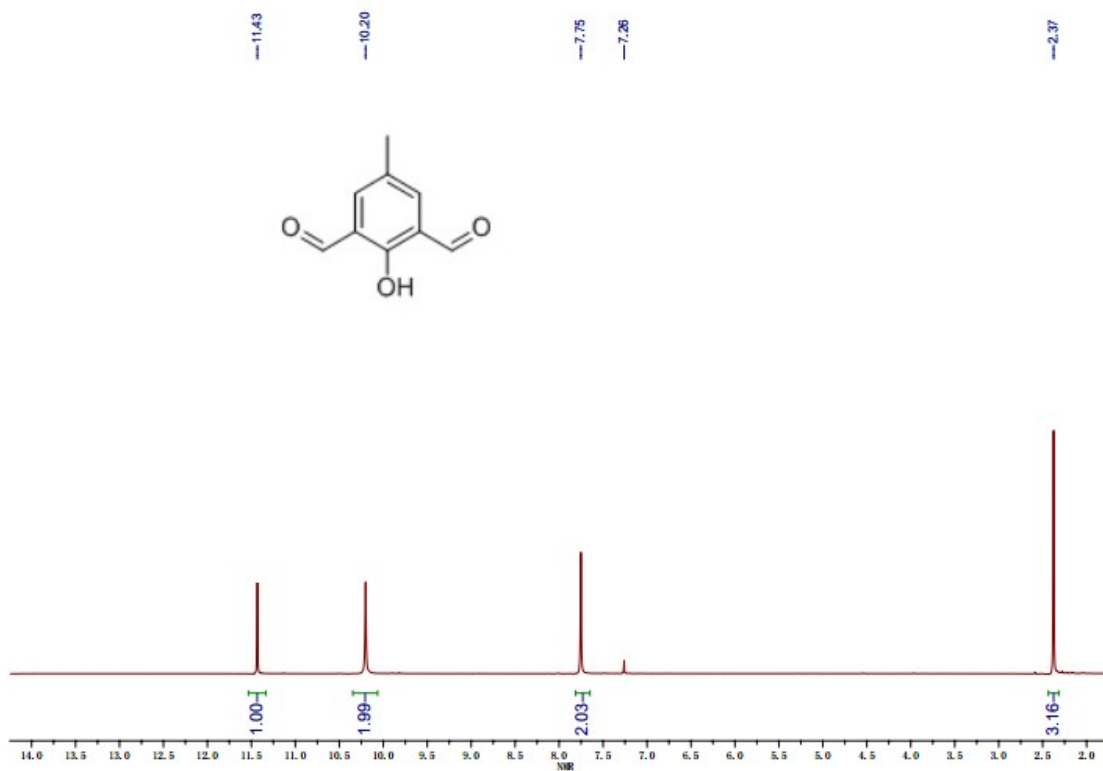

Fig. S6. <sup>1</sup>H NMR spectrum of compound 1 in CDCl<sub>3</sub>.

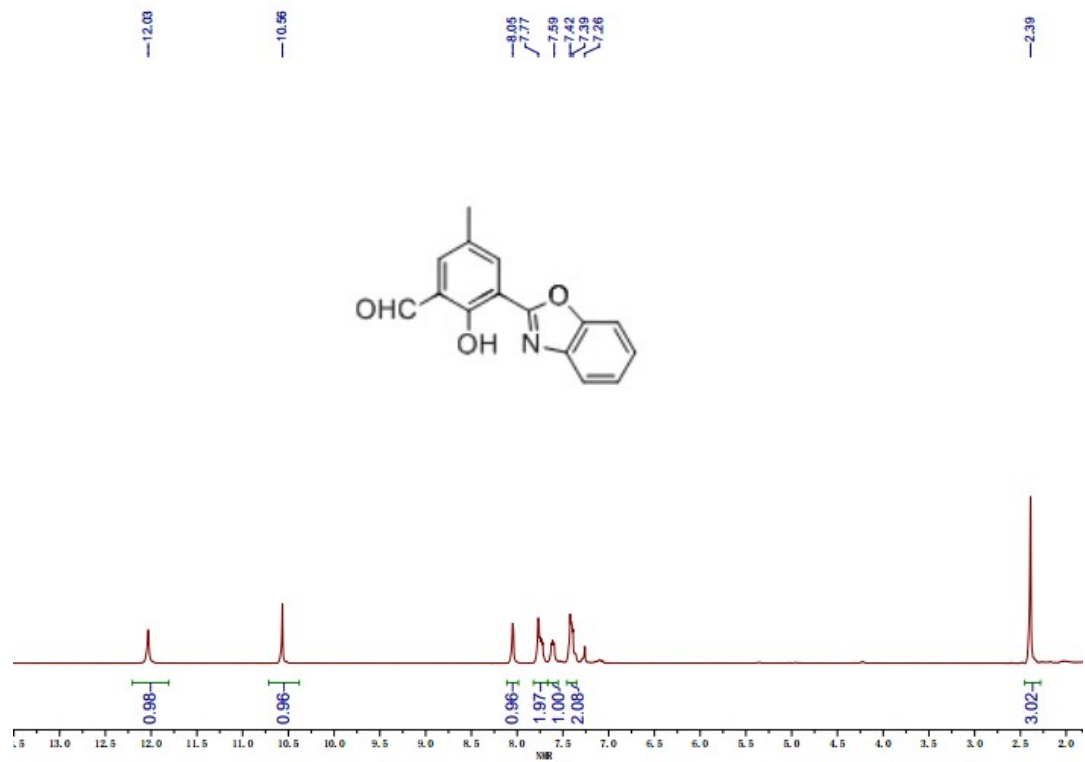

Fig. S7. <sup>1</sup>H NMR spectrum of compound **2** in CDCl<sub>3</sub>.

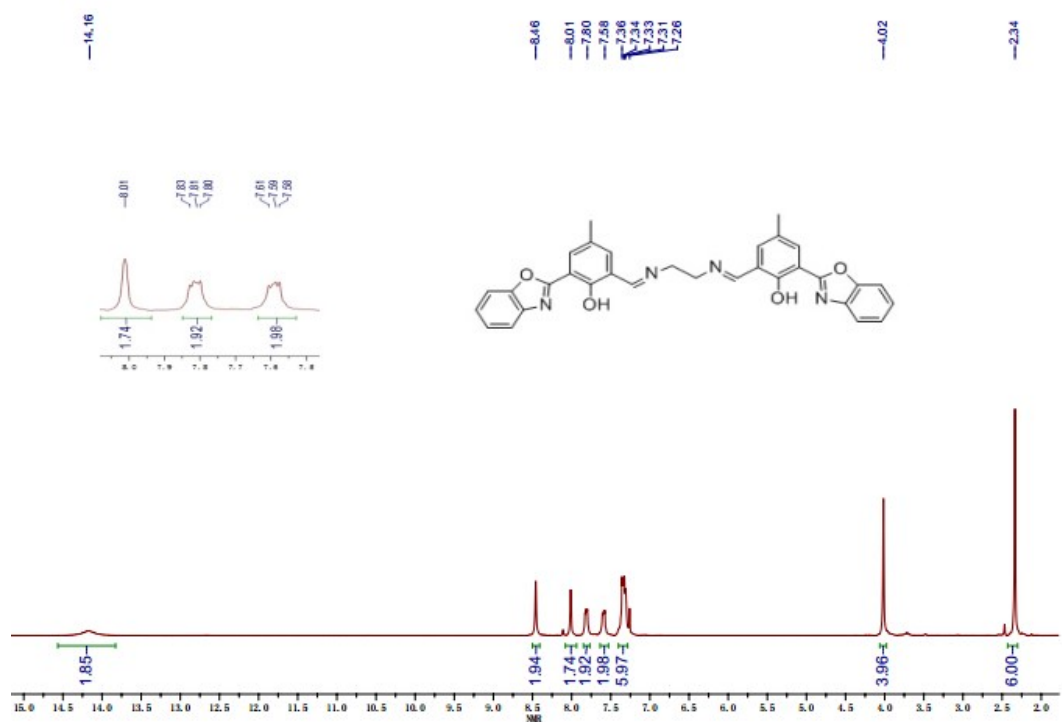

Fig. S8. <sup>1</sup>H NMR spectrum of **ZP** in CDCl<sub>3</sub>.

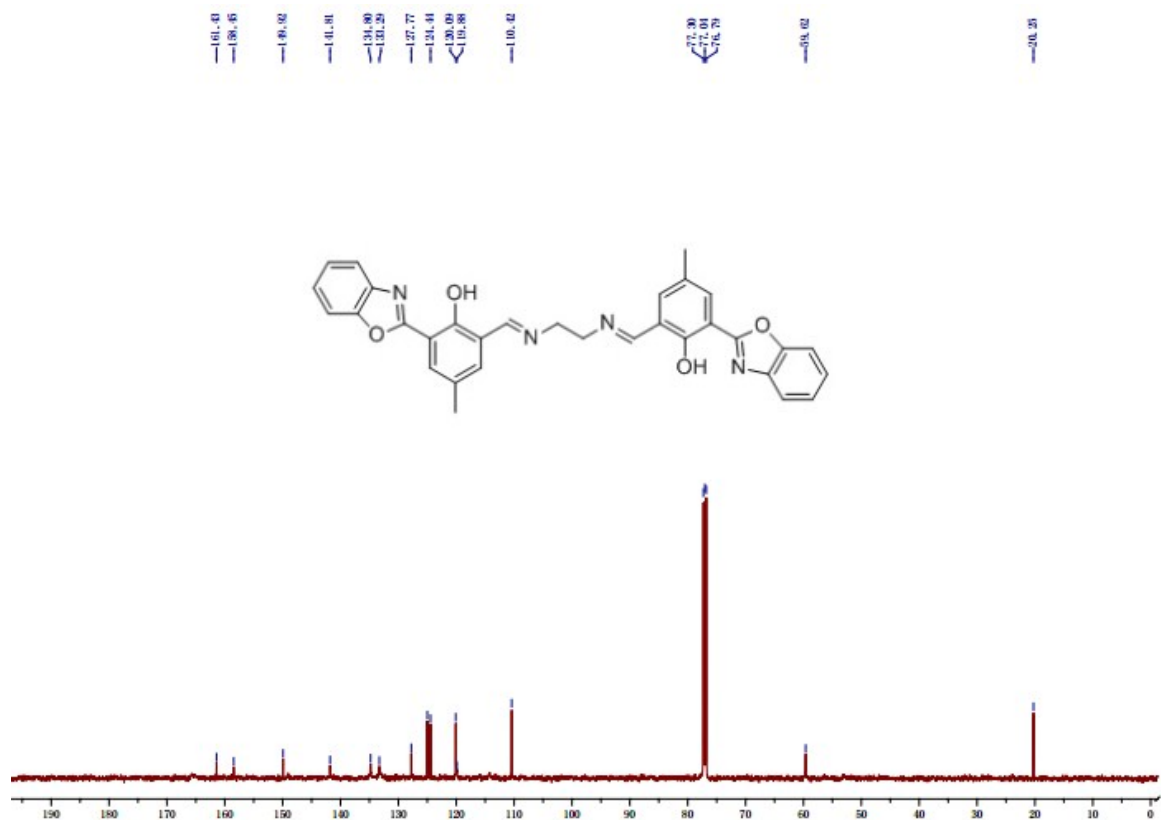

Fig. S9. <sup>13</sup>C NMR spectrum of ZP in CDCl<sub>3</sub>.

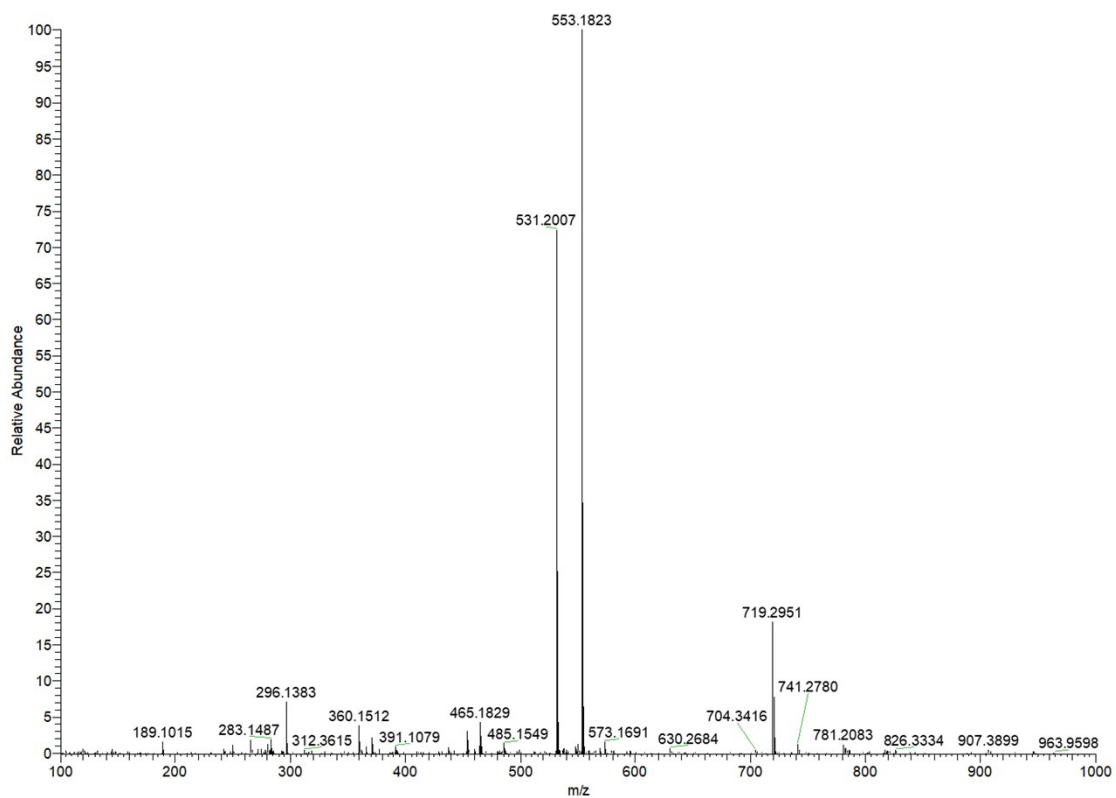

Fig. S10. HRMS spectrum of ZP.
